# Supplementary material
Source: publisher figshare collection journal article supplement (https://karger.figshare.com/articles/dataset/_/4557946)
Supplement: Supplementary file 1 [file 1]

Online data supplement:

e-Figure 1

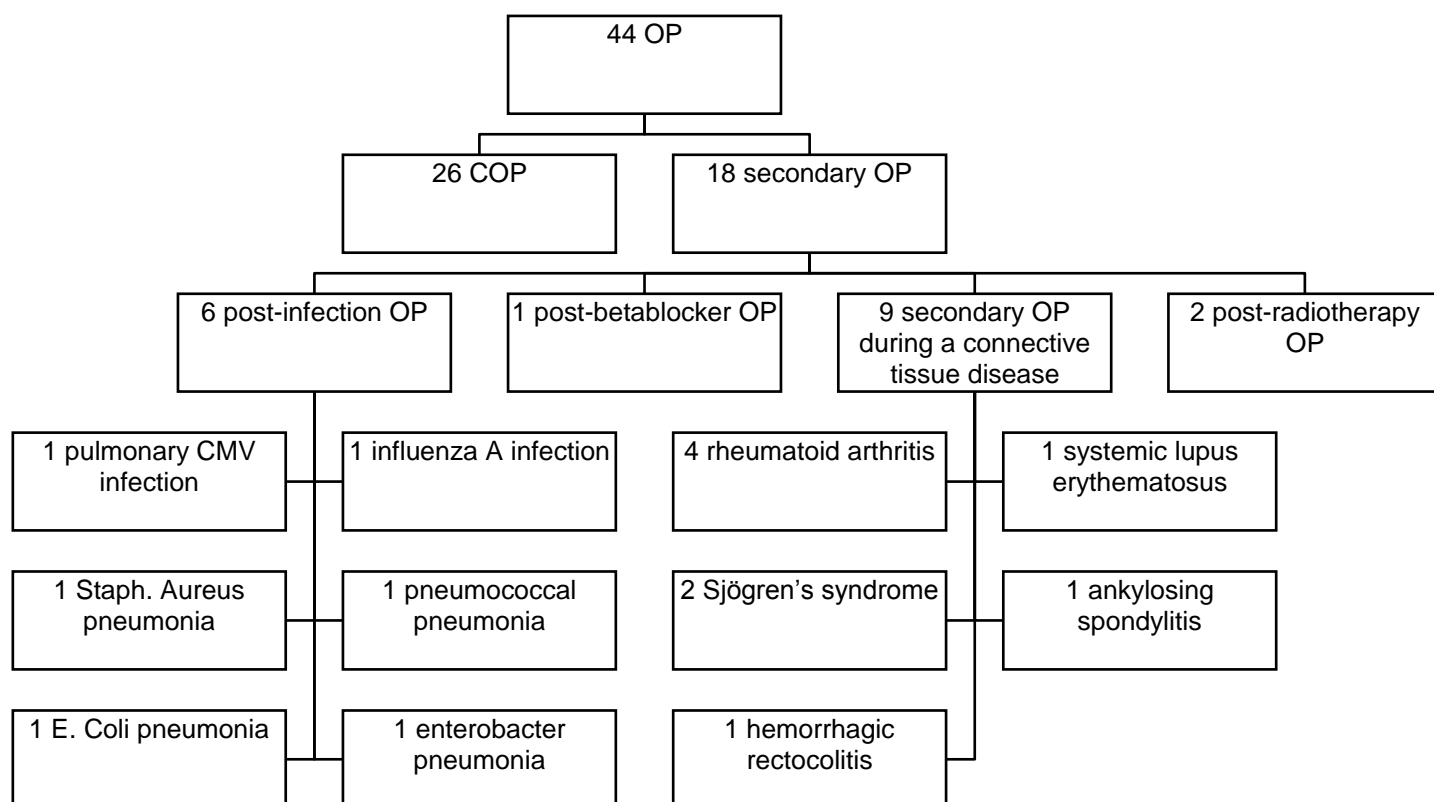

Online data supplement:

Legends of e-figures

e-Figure 1: Etiologies of the 18 cases of secondary OP

OP: organizing pneumonia, COP: cryptogenic organizing pneumonia, CMV: cytomegalovirus
